# Supplementary material for: Stratification of Tamoxifen Synergistic Combinations for the Treatment of ER+ Breast Cancer
Source: MDPI journal article supplement (doi:10.3390/cancers15123179), 2023-06-14
Supplement: s1 [file s1]

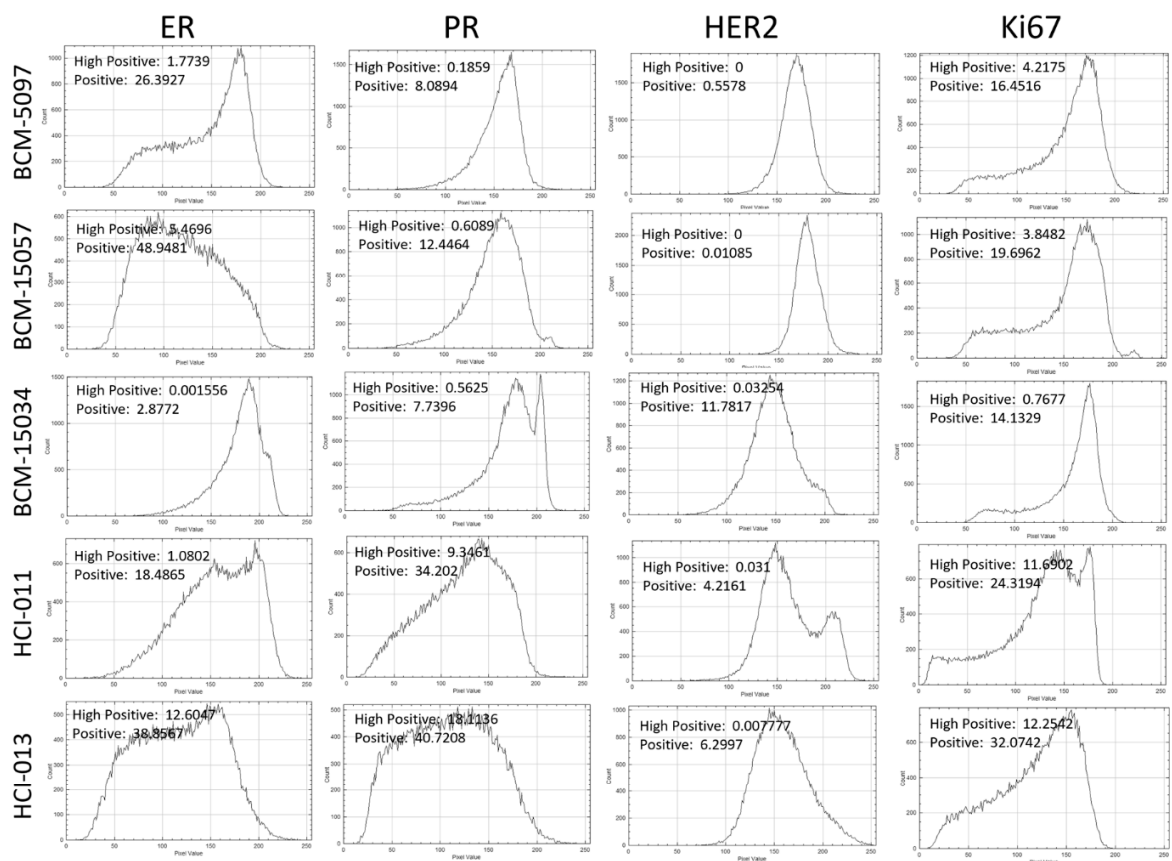

Supplemental Figure S1. Representative histograms of signal intensity of IHC images corresponding to Figure 1A. High positive and positive scores are listed as a percentage of pixels.

A

Patient biomarker status

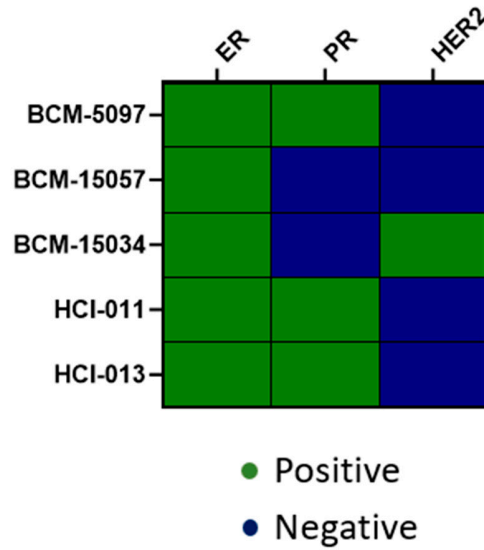

B

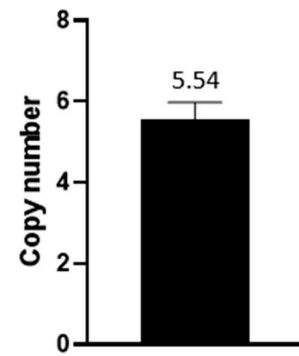

Supplemental Figure S2. (A) Heatmap representing patient ER, PR and HER2 status from which PDX models were generated, as reported by the Baylor College of Medicine PDX Portal. (B) Copy number of HER2 in PDX model BCM-15034 as established by Oncomine.

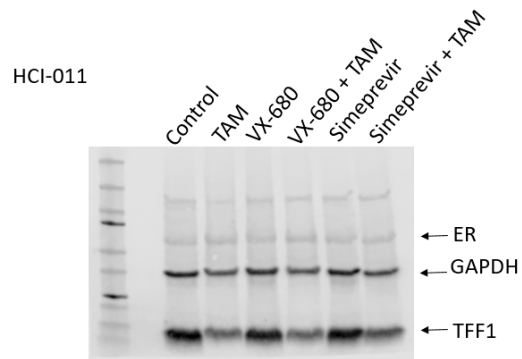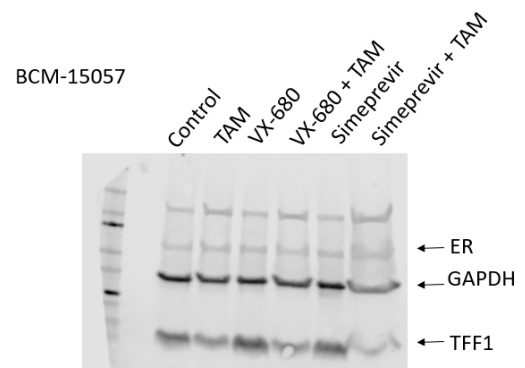

Supplemental Figure S3. Complete western blot images of in vivo experiments included in Figure 8

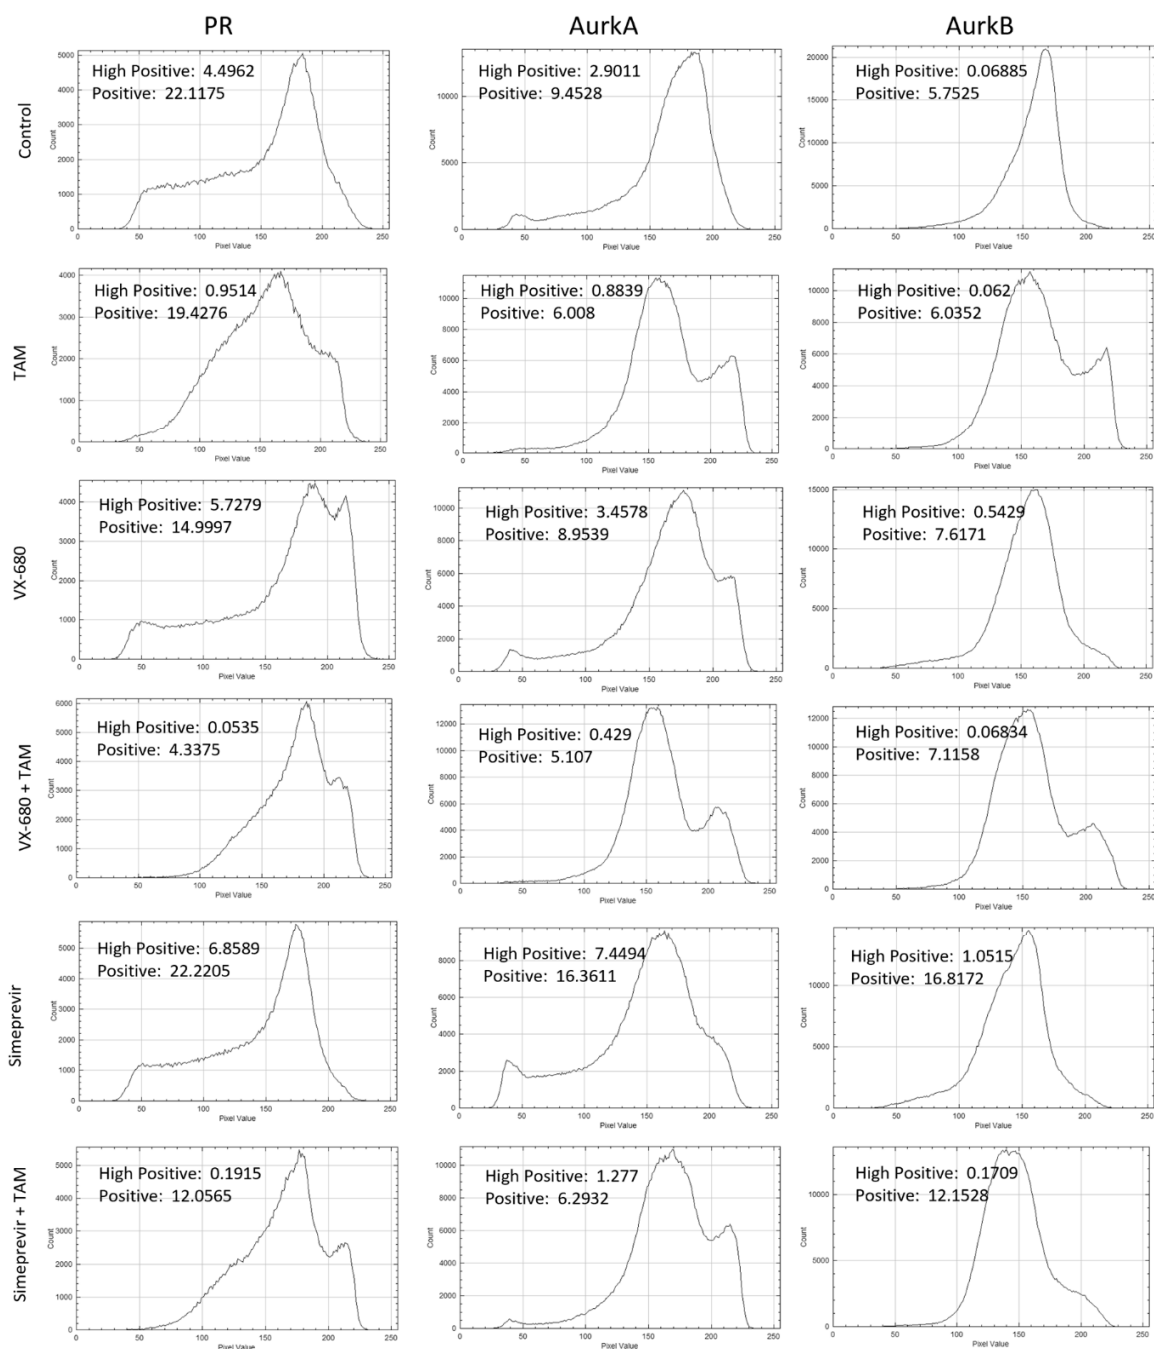

Supplemental Figure S4. Representative histograms of signal intensity of IHC images corresponding to Figure 8C. High positive and positive scores are listed as a percentage of pixels.

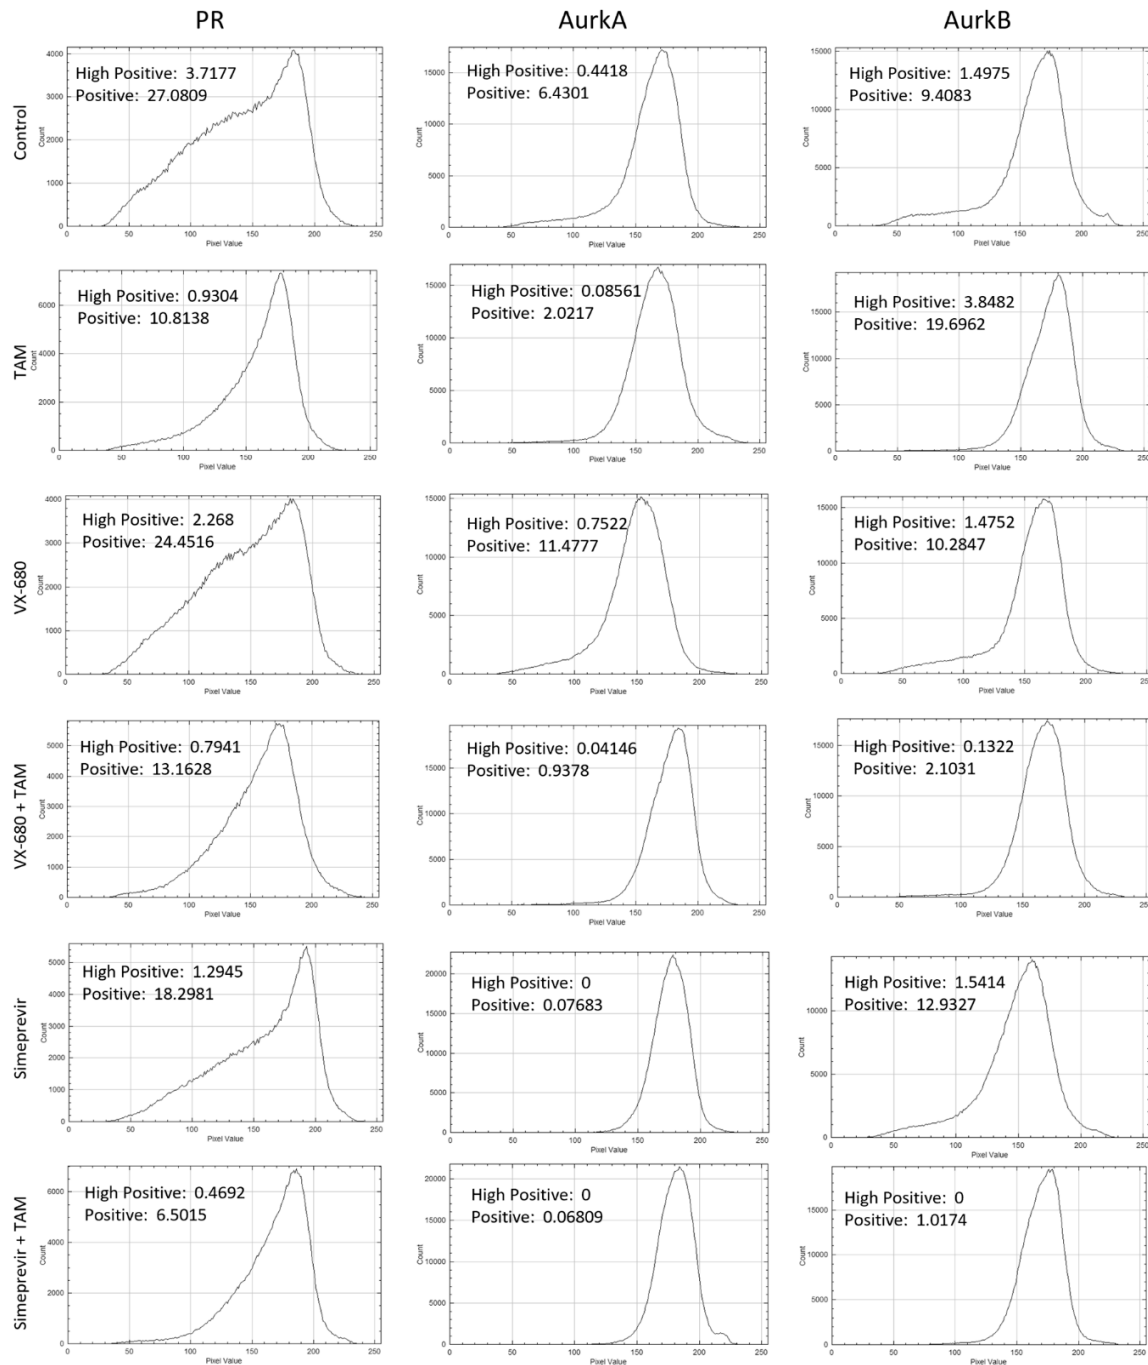

Supplemental Figure S5. Representative histograms of signal intensity of IHC images corresponding to Figure 8D. High positive and positive scores are listed as a percentage of pixels.

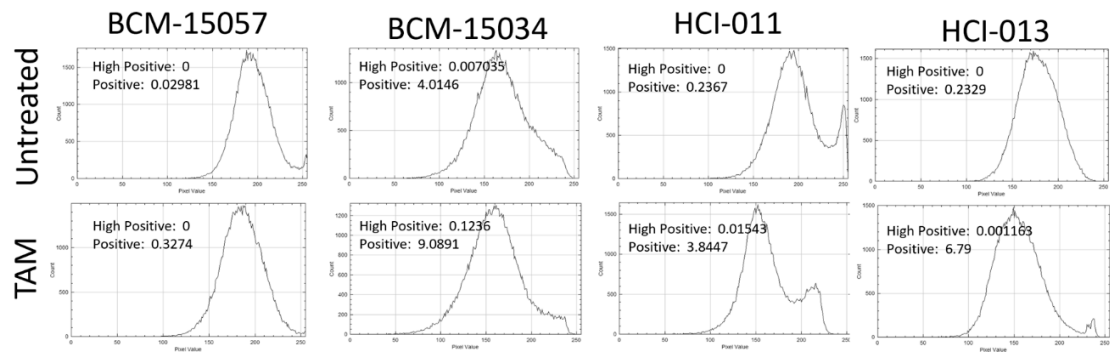

Supplemental Figure S6. Representative histograms of signal intensity of IHC images corresponding to Figure 9A. High positive and positive scores are listed as a percentage of pixels.

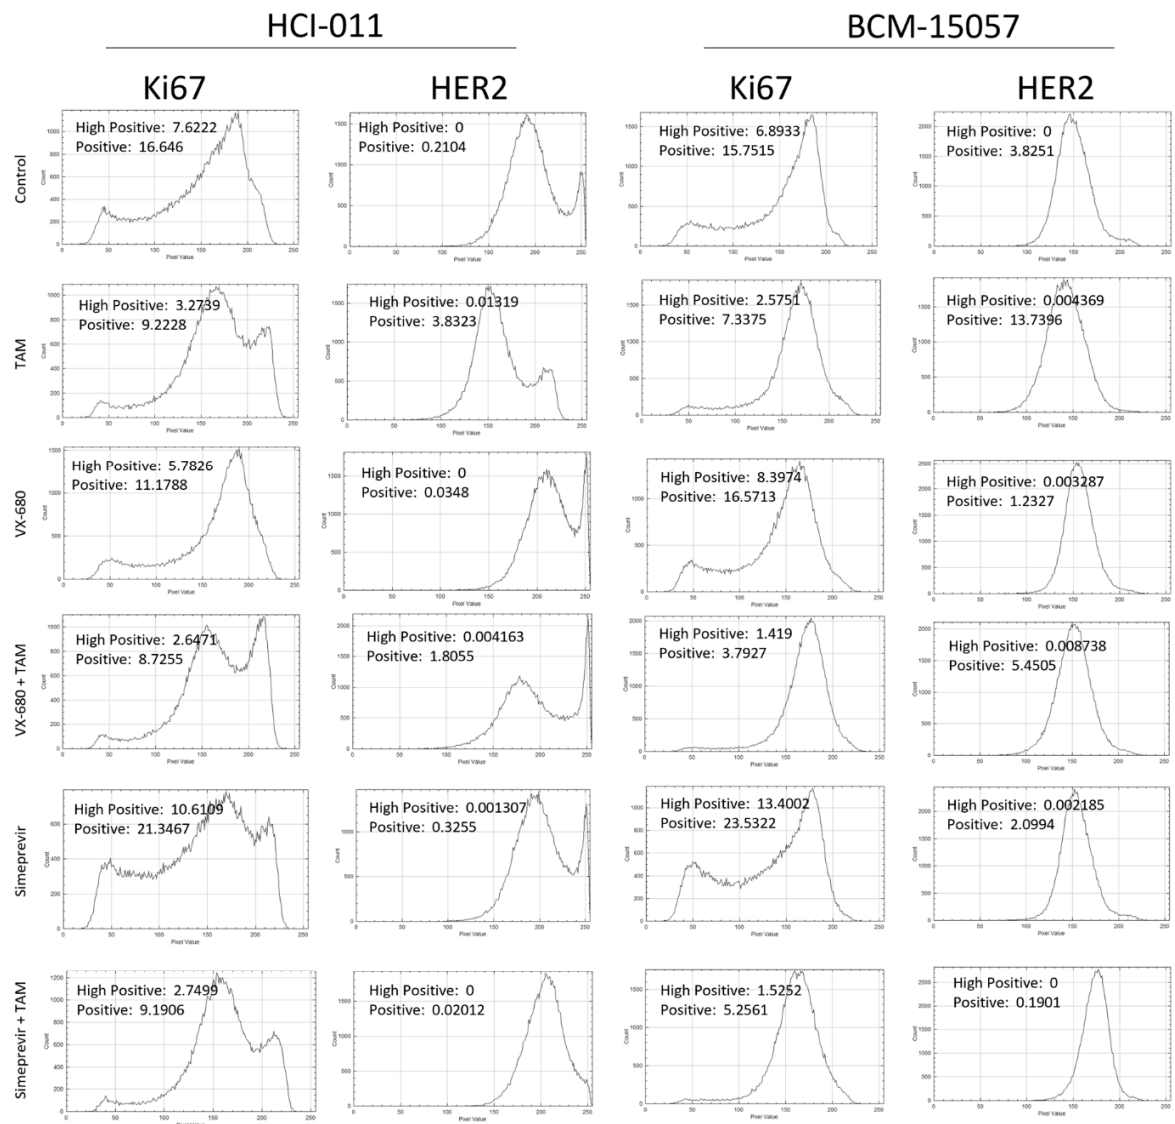

Supplemental Figure S7. Representative histograms of signal intensity of IHC images corresponding to Figure 9B-C. High positive and positive scores are listed as a percentage of pixels.





Supplemental information

| GSE         | Samples (bulk)                                                                                                                                                                                                                                                                                                                                                                                                                        |                                                                                                                                                                                                                                                                                                                                                                                                                   | GSE         | Samples (single cell)                                                                                                                                                                         |
|-------------|---------------------------------------------------------------------------------------------------------------------------------------------------------------------------------------------------------------------------------------------------------------------------------------------------------------------------------------------------------------------------------------------------------------------------------------|-------------------------------------------------------------------------------------------------------------------------------------------------------------------------------------------------------------------------------------------------------------------------------------------------------------------------------------------------------------------------------------------------------------------|-------------|-----------------------------------------------------------------------------------------------------------------------------------------------------------------------------------------------|
| GSE118942   | HCI01.MGT.101020<br>HCI01.MGT.101021<br>HCI01.MGT.101022<br>HCI02.MGT.100945<br>HCI02.MGT.100946<br>HCI02.MGT.100948<br>HCI03.MGT.102031<br>HCI04.MGT.100763<br>HCI08.MGT.100879<br>HCI09.MGT.100241<br>HCI09.MGT.100508<br>HCI09.MGT.100511<br>HCI09.MGT.100512<br>HCI10.MGT.100276<br>HCI10.MGT.100277                                                                                                                              | HCI13.MGT.100822<br>PT52.MGT.100302<br>PT52.MGT.100303<br>PT52.MGT.100304<br>PT52.MGT.100775<br>PT52.MGT.100916<br>PT52.MGT.100917<br>WHIM2.MGT.100000<br>WHIM2.MGT.100027<br>WHIM2.MGT.100076<br>WHIM30.MGT.100431<br>WHIM30.MGT.175278A<br>WHIM30.MGT.181040A<br>WHIM30.MGT.182696A<br>WHIM30.MGT.NSG21A                                                                                                        | In progress | BCM-15034_107352<br>BCM-15034_107244<br>BCM-15034TamR_107634<br>BCM-15057_107684<br>BCM-5097_107348<br>HCI-011_107322<br>HCI-011_107409<br>HCI-013_106662<br>HCI-013_106663<br>HCI-013_107785 |
| GSE189325   | WHIM2.107647<br>WHIM2.107647b                                                                                                                                                                                                                                                                                                                                                                                                         | WHIM2.107668<br>WHIM2.107672                                                                                                                                                                                                                                                                                                                                                                                      |             |                                                                                                                                                                                               |
| In progress | BCM.0132.107564<br>BCM.15034.107894<br>BCM.15057.107957<br>BCM.15057.107968<br>BCM.2147.107741<br>BCM.2147.107744<br>BCM.2147.107745<br>BCM.2147CR2.107841<br>BCM.2147CR2.107842<br>BCM.2277.107573<br>BCM.3887.107696<br>BCM.5097.107568<br>BCM.5097.107931<br>HCI.001.107935<br>HCI.011.107898<br>HCI.013.107857<br>HCI.013.107939<br>UCD52CR21.107961<br>UCD52CR21.107964<br>UCD52CR21.107966<br>UCD52CR21.107967<br>WHIM30.107947 | WHIM30CR6.107919<br>WHIM30CR6.107920<br>WHIM30CR7.107949<br>WHIM30CR7.107950<br>WHIM30CR7.107951<br>BCM.15034.107510<br>BCM.15057.107336<br>BCM.5097.107567<br>BCM.7482.107504<br>HCI.001.100097<br>HCI.011.107518<br>HCI.011.107522<br>HCI.013.102249<br>UCD52.100398<br>UCD52.100916<br>UCD52.107627<br>UCD52CR.107532<br>UCD52CR.107591<br>UCD52CR.107592<br>WHIM30.107661<br>WHIM30.107662<br>WHIM30CR.107502 |             |                                                                                                                                                                                               |
| In progress | HCI.013.107415<br>BCM.15034TamR3.107922<br>BCM.15034TamR3.107924                                                                                                                                                                                                                                                                                                                                                                      | BCM.15057EI3.107630<br>BCM.15057EI3.107640                                                                                                                                                                                                                                                                                                                                                                        |             |                                                                                                                                                                                               |

Supplemental Table S1. Bulk and scRNA samples used in this study.

| Drugs included in high throughput screening                                                                                                                                                                                                                                                                                                                                                                                                                                                                                                                                                                                                                                                                                                                                                                                                                                                |                                                                                                                                                                                                                                                                                                                                                                                                                                                                                                                                                                                                                                                                                                                                                             |                                                                                                                                                                                                                                                                                                                                                                                                                                                                                                                                                                                                                                                                                                                                                                                                                                           |
|--------------------------------------------------------------------------------------------------------------------------------------------------------------------------------------------------------------------------------------------------------------------------------------------------------------------------------------------------------------------------------------------------------------------------------------------------------------------------------------------------------------------------------------------------------------------------------------------------------------------------------------------------------------------------------------------------------------------------------------------------------------------------------------------------------------------------------------------------------------------------------------------|-------------------------------------------------------------------------------------------------------------------------------------------------------------------------------------------------------------------------------------------------------------------------------------------------------------------------------------------------------------------------------------------------------------------------------------------------------------------------------------------------------------------------------------------------------------------------------------------------------------------------------------------------------------------------------------------------------------------------------------------------------------|-------------------------------------------------------------------------------------------------------------------------------------------------------------------------------------------------------------------------------------------------------------------------------------------------------------------------------------------------------------------------------------------------------------------------------------------------------------------------------------------------------------------------------------------------------------------------------------------------------------------------------------------------------------------------------------------------------------------------------------------------------------------------------------------------------------------------------------------|
| Gatifloxacin<br>Gemcitabine HCl<br>Rigosertib (ON-01910, Estybon)<br>Fulvestrant<br>Cilnidipine<br>Lidocaine<br>Dexrazoxane HCl (ICRF-187, ADR-529)<br>Epothilone B (EPO906, Patupilone)<br>Celecoxib<br>Enzastaurin (LY317615)<br>Aprepitant<br>Posaconazole<br>IPI-145 (INK1197)<br>Ramelteon<br>Tenofovir Disoproxil Fumarate<br>Vincristine<br>Entecavir Hydrate<br>Vatalanib (PTK787) 2HCl<br>LY2835219<br>Mianserin HCl<br>Imatinib Mesylate (STI571)<br>Doxorubicin (Adriamycin) HCl<br>Pelitinib (EKB-569)<br>Cediranib (AZD217)<br>5-Azacytidine<br>Macitentan<br>Carfilzomib (PR-171)<br>MEK162 (ARRY-162, ARRY-438162)<br>Etoposide<br>Bendamustine HCl<br>Plerixafor (AMD3100)<br>Saracatinib (AZD0530)<br>Bosutinib (SKI-606)<br>Carboplatin<br>Lenvatinib (E7080)<br>Cladribine<br>Tivozanib (AV-951)<br>Mercaptopurine (6-MP)<br>Floxuridine<br>Acitretin<br>Fluoxetine HCl | Salmeterol xinafoate<br>Saquinavir mesylate<br>Simeprevir<br>Tamibarotene<br>Teneligliptin hydrobromide<br>TH-302<br>Vinblastine sulfate<br>Vinorelbine ditartrate<br>Ziprasidone<br>Ziprasidone hydrochloride monohydrate<br>Doxorubicin<br>Lapatinib Ditosylate<br>MLN2238<br>CEP-18770<br>Disulfiram<br>Marimastat<br>17-AAG (KOS953)<br>AT13387 (Onalespib)<br>Elvitegravir (GS-9137)<br>Rocilinostat (ACY-1215)<br>Vorinostat (SAHA, MK0683)<br>CUDC-101<br>Pracinostat (SB939)<br>Belinostat (PXD101)<br>PCI-24781 (CRA-024781)<br>MLN8237 (Alisertib)<br>VX-680 (MK-0457, Tozasertib)<br>Barasertib (AZD1152-HQPA)<br>Birinapant (TL32711)<br>YM155<br>Amuvatinib (MP-470, HPK 56)<br>Ketoconazole<br>Sildenafil Citrate<br>Mycophenolate<br>Mofetil | CX-4945 (Silmeltasertib)<br>Bleomycin Sulfate<br>Linsitinib<br>BYL-719 (Alpelisib)<br>Pazopanib Hydrochloride<br>LY2157299<br>VX-809<br>Alendronate sodium<br>Arbidol HCl<br>Chlorprothixene<br>Clotrimazole<br>Conivaptan HCl<br>Cytarabine<br>Dinaciclib (SCH727965)<br>Diphenylpyraline HCl<br>Docosanol (Abreua)<br>Dovitinib Dilactic acid<br>Duloxetine HCl<br>Emtricitabine<br>Enoxacin (Penetrex)<br>Estradiol<br>Fenticonazole Nitrate<br>Furosemide<br>Gabapentin<br>Gemcitabine<br>Indomethacin<br>Lamivudine<br>Lithocholic Acid<br>Meloxicam (Mobic)<br>Oxethazaine<br>Pitavastatin Calcium<br>Prochlorperazine<br>Rosuvastatin Calcium<br>Simvastatin (Zocor)<br>Terfenadine<br>Thioridazine HCl<br>Vitamin D2 (Ergocalciferol)<br>GSK2126458 (Omipalisib)<br>BI6727 (Volasertib)<br>Chloroquine diphosphate<br>Deferasirox |

|                                  |                                  |                           |
|----------------------------------|----------------------------------|---------------------------|
| Epirubicin HCl                   | Aminophylline                    | Sunitinib                 |
| Pamidronate Disodium             | Methotrexate                     | Ulipristal acetate        |
| Idarubicin HCl                   | Pralatrexate                     | Doripenem                 |
| Malotilate                       | Pyrimethamine                    | Cytarabine hydrochloride  |
| Ampicillin                       | Fluvastatin Sodium               | AZD-9291 (Osimertinib)    |
| Kanamycin Sulfate                | Lovastatin                       | Efavirenz                 |
| Tetracycline Hydrochloride       | Atorvastatin Calcium             | Nelfinavir                |
| Vortioxetine (Lu AA21004) HBr    | Evacetrapib<br>(LY2484595)       | Pitavastatin              |
| Carmofur                         | Lonafarnib                       | Ondansetron               |
| Fluvoxamine maleate              | Tolcapone                        | hydrochloride dihydrate   |
| Aprotinin                        | Ganetespib (STA-<br>9090)        | Meropenem trihydrate      |
| Nafamostat Mesylate(FUT-175)     | Pemetrexed                       | (+)-Ketoconazole          |
| Amonafide                        | Paclitaxel (Taxol)               | Haloperidol hydrochloride |
| Ivermectin                       | Docetaxel                        | Valproic acid             |
| Doxazosin Mesylate               | 10-DAB (10-<br>Deacetylbaecatin) | Glycopyrrolate            |
| Nepafenac                        | Mitomycin C                      | Reserpine hydrochloride   |
| Masitinib (AB1010)               | Streptozocin                     | Carvedilol                |
| Loratadine                       | Melphalan                        | Nebivolol                 |
| Foretinib (GSK1363089)           | Asenapine                        | Epinephrine Bitartrate    |
| Cabozantinib (XL184, BMS-907351) | Ivacaftor (VX-770)               | Miltefosine               |
| PCI-32765 (Ibrutinib)            | Heparin sodium                   | Phenformin HCl            |
| CAL-101 (Idelalisib, GS-1101)    | Ondansetron HCl                  | Spirolactone              |
| ABT-263 (Navitoclax)             | Alfuzosin HCl                    | Ciclopirox ethanolamine   |
| Sorafenib                        | Linezolid                        | Amiodarone HCl            |
| Dasatinib (BMS-354825)           | Clopidogrel                      | Loperamide HCl            |
| (R)-Crizotinib                   | Prazosin HCl                     | Tamoxifen Citrate         |
| Pazopanib (GW-786034)            | TSU-68<br>(SU6668,Orantinib)     | Trifluoperazine 2HCl      |
| Afatinib dimaleate               | Ispinesib (SB-715992)            | Benidipine HCl            |
| Bardoxolone methyl               | Ziprasidone HCl                  | Amlodipine                |
| Boceprevir                       | LY2228820                        | Amlodipine Besylate       |
| Cariprazine                      | Abiraterone acetate              | Flunarizine 2HCl          |
| Cinacalcet                       | Ritonavir                        | Cinacalcet HCl            |
| CO-1686 (AVL-301)                | Lopinavir                        | Rimonabant                |
| Cobimetinib                      | Atazanavir                       | Acemetacin                |
| Colchicine                       | AZD6244<br>(Selumetinib)         | Etodolac                  |
| Dabigatran etexilate mesylate    | Lapatinib                        | Tolfenamic Acid           |
| Docetaxel Trihydrate             | Gefitinib (ZD1839)               | Procarbazine HCl          |
| Dronedarone                      | Nilotinib(AMN-107)               | Chlorpromazine HCl        |
| Elacridar                        |                                  | Dopamine HCl              |
| Eltrombopag Olamine              |                                  | Clomiphene citrate        |
| EMD-1214063                      |                                  | Mifepristone              |
| Erlotinib                        |                                  | Toremifene Citrate        |
| Fluvastatin                      |                                  | Raloxifene HCl            |

|                                                                                                                                                                                                                                                                                                                                                                                                                                                                                                                                                                                                                                                                                                                                                                                                                                                   |                                                                                                                                                                                                                                                                                                                                                                                                                                                                                                                                                                                                                                                                                                                                                         |                                                                                                                                                                                                                                                                                                                                                                                                                                                                                                                                                                                                                                                                                                                                        |
|---------------------------------------------------------------------------------------------------------------------------------------------------------------------------------------------------------------------------------------------------------------------------------------------------------------------------------------------------------------------------------------------------------------------------------------------------------------------------------------------------------------------------------------------------------------------------------------------------------------------------------------------------------------------------------------------------------------------------------------------------------------------------------------------------------------------------------------------------|---------------------------------------------------------------------------------------------------------------------------------------------------------------------------------------------------------------------------------------------------------------------------------------------------------------------------------------------------------------------------------------------------------------------------------------------------------------------------------------------------------------------------------------------------------------------------------------------------------------------------------------------------------------------------------------------------------------------------------------------------------|----------------------------------------------------------------------------------------------------------------------------------------------------------------------------------------------------------------------------------------------------------------------------------------------------------------------------------------------------------------------------------------------------------------------------------------------------------------------------------------------------------------------------------------------------------------------------------------------------------------------------------------------------------------------------------------------------------------------------------------|
| Ledipasvir<br>Luliconazole<br>Mefloquine hydrochloride<br>Micafungin sodium<br>MK-4305<br>Nelfinavir Mesylate<br>Pemetrexed disodium hemipenta hydrate<br>Perampanel<br>Pregabalin<br>Regorafenib hydrochloride<br>RG7388<br>Salirasib<br>Benzydamine HCl<br>Bosentan<br>Broxyquinoline<br>Cetrimonium Bromide (CTAB)<br>Cetylpyridinium Chloride<br>Chlorocresol<br>Chlorquinaldol<br>Chlorzoxazone<br>Clindamycin Phosphate<br>Clofazimine<br>Closantel<br>Closantel Sodium<br>Dirithromycin<br>Domiphen Bromide<br>Ebastine<br>Epinastine HCl<br>Ethacridine lactate monohydrate<br>Fidaxomicin<br>Furaltadone HCl<br>Lomerizine HCl<br>Loxapine Succinate<br>Mechlorethamine HCl<br>Mevastatin<br>Neomycin sulfate<br>Nifuroxazide<br>Oxymetholone<br>Pimecrolimus<br>Piperacillin Sodium<br>Primaquine Diphosphate<br>Proflavine Hemisulfate | Erlotinib<br>Hydrochloride<br>Regorafenib<br>Sorafenib Tosylate<br>Afinatinib (BIBW2992)<br>Nintedanib (BIBF 1120)<br>Sunitinib malate<br>Crenolanib (CP-868596)<br><br>Quinapril HCl<br>Adefovir Dipivoxil<br>Palonosetron HCl<br>Amitriptyline HCl<br>Clomipramine HCl<br>Clozapine<br>Olanzapine<br>Paroxetine HCl<br>Prucalopride<br>Sertraline HCl<br>Dapoxetine HCl<br>LDE225 (NVP-LDE225,Erismodegib)<br>Propafenone HCl<br>Daunorubicin HCl<br>Irinotecan HCl Trihydrate<br>Topotecan HCl<br>Apatinib<br>Chlorotrianisene<br>Tamoxifen<br>Cyclobenzaprine HCl<br>Motolimod (VTX-2337)<br>INCB-024360<br>Tacrine hydrochloride<br>Estropipate<br>Puromycin dihydrochloride<br>Digoxin<br>Pimavanserin<br>Brucine<br>Nicotinamide<br>Caffeic acid | Clemastine Fumarate<br>Azelastine HCl<br>Otilonium Bromide<br>Pyridostigmine Bromide<br>Solifenacin succinate<br>Tolterodine tartrate<br>Fosbretabulin (Combretastatin A4 Phosphate (CA4P)) Disodium<br>Racecadotril<br>Alverine Citrate<br>Amfenac Sodium Monohydrate<br>Azithromycin Dihydrate<br>Benzbromarone<br>Benzethonium Chloride<br>Pimasertib (AS-703026)<br>Daclatasvir (BMS-790052) SAR245409 (XL765)<br>BIRB 796 (Doramapimod)<br>Fasudil (HA-1077) HCl<br>Quizartinib (AC220)<br>Dapagliflozin<br>Cyclosporine<br>Irbesartan<br>Rapamycin (Sirolimus)<br>Everolimus (RAD001)<br>DAPT (GSI-IX)<br>Amprenavir (agenerase)<br>Temsilolimus<br>Dacomitinib (PF299804, PF299)<br>Cisplatin<br>Tivantinib (ARQ 197)<br>LDK378 |
|---------------------------------------------------------------------------------------------------------------------------------------------------------------------------------------------------------------------------------------------------------------------------------------------------------------------------------------------------------------------------------------------------------------------------------------------------------------------------------------------------------------------------------------------------------------------------------------------------------------------------------------------------------------------------------------------------------------------------------------------------------------------------------------------------------------------------------------------------|---------------------------------------------------------------------------------------------------------------------------------------------------------------------------------------------------------------------------------------------------------------------------------------------------------------------------------------------------------------------------------------------------------------------------------------------------------------------------------------------------------------------------------------------------------------------------------------------------------------------------------------------------------------------------------------------------------------------------------------------------------|----------------------------------------------------------------------------------------------------------------------------------------------------------------------------------------------------------------------------------------------------------------------------------------------------------------------------------------------------------------------------------------------------------------------------------------------------------------------------------------------------------------------------------------------------------------------------------------------------------------------------------------------------------------------------------------------------------------------------------------|

|                              |                                  |                              |
|------------------------------|----------------------------------|------------------------------|
| Sertaconazole nitrate        | Cytisine                         | Eltrombopag                  |
| Sodium ascorbate             | Artemether                       | Ticlopidine HCl              |
| Sodium butyrate              | Chlorogenic acid                 | Ticagrelor                   |
| Sodium Nitrite               | Vinorelbine                      | Zinc Pyrithione              |
| Thiamphenicol                | vinblastine                      | Candesartan Cilexetil        |
| Tiratricol                   | Cepharanthine                    | Cyproheptadine               |
| Valganciclovir HCl           | CP-945598 HCl                    | hydrochloride                |
| Valnemulin HCl               | Dovitinib (TKI-258,<br>CHIR-258) | Dibucaine                    |
| Azathioprine                 | Altretamine                      | Ciclesonide                  |
| Bisacodyl                    | Linifanib (ABT-869)              | Tiagabine                    |
| Bromhexine HCl               | PSI-7977                         | Bedaquiline fumarate         |
| Butoconazole nitrate         | Sildenafil                       | Bedaquiline                  |
| Chenodeoxycholic Acid        | Artemether (SM-224)              | Chlorhexidine                |
| Chloroxine                   | Cobicistat (GS-9350)             | digluconate                  |
| Crystal Violet               | Imiquimod                        | Promethazine HCl             |
| Cyclamic acid                | Ponatinib (AP24534)              | Losmapimod                   |
| Cyclosporin A                | ABT-199                          | Mupirocin                    |
| Diclazuril                   | Embelin                          | Hydroxychloroquine           |
| Diclofenac Diethylamine      | Neratinib (HKI-272)              | Sulfate                      |
| Diphenhydramine HCl          | Orotic acid                      | Lomitapide                   |
| Dronedarone HCl              | Anidulafungin                    | Desogestrel                  |
| Econazole nitrate            | EMPTY                            | Octreotide acetate           |
| Erythromycin Ethylsuccinate  | Cabozantinib malate<br>(XL184)   | Pentamidine                  |
| Isoconazole nitrate          | Azelnidipine                     | isethionate                  |
| Isoniazid                    | Licofelone                       | Topotecan                    |
| Levosimendan                 | KPT-330                          | Pentobarbital sodium<br>salt |
| Menadione                    | Mizoribine                       | Radotinib(IY-5511)           |
| Mequinol                     | Benserazide HCl                  | Pexidartinib (PLX3397)       |
| Miconazole                   | Bazedoxifene HCl                 | Entrectinib                  |
| Miconazole Nitrate           | Mubritinib (TAK 165)             | R788 disodium                |
| Mycophenolic acid            | Tripelennamine HCl               | Doxycycline HCl              |
| Nadifloxacin                 | Rupatadine Fumarate              | L-Glutamine                  |
| Nalidixic acid               | Homatropine                      | Fingolimod (FTY720)          |
| Nedaplatin                   | Methylbromide                    | Vandetanib (ZD6474)          |
| Nifedipine                   | Amoxapine                        | TOK-001                      |
| Nisoldipine                  | Bacitracin                       | Oxaliplatin                  |
| Oxytetracycline (Terramycin) | Capreomycin Sulfate              | Pacritinib                   |
| Rifampin                     | Chlorhexidine HCl                | VRT752271                    |
| Sodium salicylate            | Colistin Sulfate                 |                              |
| Sorbitol                     | Diacerein                        |                              |
| Streptomycin sulfate         | Flubendazole                     |                              |
| Sulbactam sodium             |                                  |                              |
| Sulconazole Nitrate          |                                  |                              |

|                                |                         |  |
|--------------------------------|-------------------------|--|
| Sulfamerazine                  | Fudosteine              |  |
| Sulfameter                     | Meclizine 2HCl          |  |
| Sulfamethizole                 | Minocycline HCl         |  |
| Terbinafine HCl                | Nicardipine HCl         |  |
| Tilmicosin                     | Alendronate             |  |
| Tioconazole                    | Naratriptan             |  |
| Toltrazuril                    | K-115                   |  |
| Zafirlukast                    | DL- $\alpha$ -          |  |
| Diethylstilbestrol             | Difluoromethylornithine |  |
| D-Mannitol                     | (hydrochloride hydrate) |  |
| Doxercalciferol                | Atovaquone              |  |
| Doxifluridine                  | Fostamatinib (R788)     |  |
| Haloperidol                    | Darunavir Ethanolate    |  |
| Idebenone                      | SKF 525A                |  |
| Itraconazole                   | (hydrochloride)         |  |
| Mitoxantrone HCl               | BAF312 (Siponimod)      |  |
| Rifapentine                    | Gallic acid             |  |
| Calcitriol                     | Maprotiline HCl         |  |
| Tacrolimus (FK506)             | Trimipramine            |  |
| Fosaprepitant dimeglumine salt | (maleate)               |  |
| Sitafloxacin Hydrate           | Napabucasin             |  |
| Alfacalcidol                   | Theophylline            |  |
| Cabazitaxel                    | Aminoguanidine          |  |
| Poziotinib                     | hydrochloride           |  |
| Pimozide                       | Imipramine              |  |
| Ciclopirox                     | (hydrochloride)         |  |
| Oltipraz                       |                         |  |
| Triclosan                      |                         |  |
